# Supplementary material for: Mo-doped SnS2 with enriched S-vacancies for highly efficient electrocatalytic N2 reduction: the critical role of the Mo–Sn–Sn trimer
Source: Royal Society of Chemistry journal article supplement (doi:10.1039/d0ta01688h), 2020-01-01
Supplement: d0ta01688h1.pdf [file d0ta01688h1.pdf]

## Supporting Information

### **Mo-doped SnS<sub>2</sub> with enriched S-vacancies for highly efficient electrocatalytic N<sub>2</sub> reduction: the critical role of Mo-Sn-Sn trimer**

Ke Chu\*, Jing Wang, Ya-ping Liu, Qing-qing Li, Ya-li Guo

*School of Materials Science and Engineering, Lanzhou Jiaotong University, Lanzhou 730070, China*

\*Corresponding author. E-mail address: chukelut@163.com (K. Chu)

## Experimental

### *Synthesis of Mo-SnS<sub>2</sub>/CC*

All the chemicals were used as received without further purification. In brief, a piece of carbon cloth (CC, 2 cm × 4 cm) was ultrasonically treated in concentrated HCl for 2 h, and cleaned with ethanol and distilled water several times. Then, 0.18 mM of thioacetamide and 0.09 mM of SnCl<sub>4</sub>·5H<sub>2</sub>O were dissolved in 30 mL of deionized water under stirring for 10 min, followed by addition of 0.001 mM of (NH<sub>4</sub>)<sub>6</sub>Mo<sub>7</sub>O<sub>24</sub>·4H<sub>2</sub>O under stirring for another 10 min. The mixed solution was transferred into a Teflon-lined stainless-steel autoclave, followed by immersing the pretreated CC in the solution. The autoclave was sealed and maintained at 180 °C for 24 h. After cooling to room temperature, the obtained Mo-SnS<sub>2</sub>/CC was washed with deionized water and ethanol several times, and dried at 60 °C overnight. For comparison, the pristine SnS<sub>2</sub>/CC was prepared by the same procedure without addition of (NH<sub>4</sub>)<sub>6</sub>Mo<sub>7</sub>O<sub>24</sub>·4H<sub>2</sub>O.

### *Electrochemical measurements*

Electrochemical measurements were tested on a CHI-660E electrochemical workstation in a three-electrode configuration including working electrode (CC sample), reference electrode (Ag/AgCl), and counter electrode (graphite rod). All potentials were referenced to the reversible hydrogen electrode (RHE). The RHE calibration was experimentally conducted in the high-purity hydrogen saturated 0.5 M LiClO<sub>4</sub> electrolyte by cyclic voltammeters curves, with using graphite rod and Pt wire as counter and working electrodes, respectively (Fig. S2). The NRR tests were conducted in an H-type two-compartment electrochemical cell separated by a Nafion 211 membrane. An absorber was set at the end of cell to avoid the loss of produced NH<sub>3</sub> by N<sub>2</sub> flow. The Nafion membrane was pretreated by boiling it in 5% H<sub>2</sub>O<sub>2</sub> solution for 1 h, 0.5 M H<sub>2</sub>SO<sub>4</sub> for 1 h and deionized water for 1 h in turn. During each electrolysis, ultra-high-purity N<sub>2</sub> gas (99.999%) was continuously purged into the cathodic chamber at a flow rate of 20 mL min<sup>-1</sup>. After each NRR electrolysis, the solution in absorber was poured back into the cathodic compartment for the NH<sub>3</sub>

detection. The produced  $\text{NH}_3$  and possible  $\text{N}_2\text{H}_4$  were quantitatively determined by the indophenol blue method[1], and approach of Watt and Chrisp[2], respectively.

### ***Determination of $\text{NH}_3$***

Typically, 4 mL of electrolyte was removed from the electrochemical reaction vessel. Then 50  $\mu\text{L}$  of solution containing NaOH (0.75 M) and NaClO ( $\rho_{\text{Cl}} = \sim 4.5$ ), 500  $\mu\text{L}$  of solution containing 0.32 M NaOH, 0.4 M  $\text{C}_7\text{H}_6\text{O}_3\text{Na}$ , and 50  $\mu\text{L}$  of  $\text{C}_5\text{FeN}_6\text{Na}_2\text{O}$  solution (1 wt%) were respectively added into the electrolyte. After standing for 2 h, the UV-Vis absorption spectrum was measured and the concentration-absorbance curves were calibrated by the standard  $\text{NH}_4\text{Cl}$  solution with a series of concentrations.

$\text{NH}_3$  yield was calculated by the following equation:

$$\text{NH}_3 \text{ yield } (\mu\text{g h}^{-1} \text{ mg}_{\text{cat}}^{-1}) = \frac{c_{\text{NH}_3} \times V}{t \times m} \quad (1)$$

Faradaic efficiency was calculated by the following equation:

$$\text{Faradaic efficiency } (\%) = \frac{3 \times F \times c_{\text{NH}_3} \times V}{17 \times Q} \times 100\% \quad (2)$$

where  $c_{\text{NH}_3}$  ( $\mu\text{g mL}^{-1}$ ) is the measured  $\text{NH}_3$  concentration,  $V$  (mL) is the volume of the electrolyte,  $t$  (h) is the reduction time and  $m$  (mg) is the mass loading of the catalyst on CC.  $F$  (96500 C mol<sup>-1</sup>) is the Faraday constant,  $Q$  (C) is the quantity of applied electricity.

### ***Determination of $\text{N}_2\text{H}_4$***

Typically, 5 mL of electrolyte was removed from the electrochemical reaction vessel. The 330 mL of color reagent containing 300 mL of ethyl alcohol, 5.99 g of  $\text{C}_9\text{H}_{11}\text{NO}$  and 30 mL of HCl were prepared, and 5 mL of color reagent was added into the electrolyte. After stirring for 10 min, the UV-vis absorption spectrum was measured and the concentration-absorbance curves were calibrated by the standard  $\text{N}_2\text{H}_4$  solution with a series of concentrations.

### ***Characterizations***

X-ray diffraction (XRD) pattern was recorded on a Rigaku D/max 2400 diffractometer. X-ray photoelectron spectroscopy (XPS) analysis

was performed on a PHI 5702 spectrometer. Scanning electron microscopy (SEM) was carried out on a JSM-6701 microscope. Transmission electron microscopy (TEM), high-resolution transmission electron microscopy (HRTEM), and high-angle annular dark field (HAADF)-scanning transmission electron microscopy (STEM) were performed on a Tecnai G<sup>2</sup> F20 microscope. Electron paramagnetic resonance (EPR) measurements were performed on a Bruker ESP-300 spectrometer. Ion chromatogram measurements were conducted on a Dionex ICS-2000 ion chromatographs. <sup>1</sup>H nuclear magnetic resonance (NRM) measurements were performed on a 500 MHz Bruker superconducting-magnet NMR spectrometer. Prior to NMR measurements, <sup>14</sup>N<sub>2</sub> or <sup>15</sup>N<sub>2</sub> feed gas was purified by an acid trap (0.05 M H<sub>2</sub>SO<sub>4</sub>) to eliminate the potential NO<sub>x</sub> and NH<sub>3</sub> contaminants.

### ***Calculation details***

Spin-polarized density functional theory (DFT) calculations were performed using Cambridge sequential total energy package (CASTEP)[3]. The Perdew–Burke–Ernzerh of (PBE) of generalized gradient approximation (GGA) was used for the exchange-correlation potential. DFT-D method was employed to calculate the van der Waals (vdW) interaction. A Gamma-point centered 3×3×1 k-mesh was adopted for structural optimizations, and a plane wave cutoff was set to 500 eV. Energy and force was not reach convergence until lower to 1×10<sup>-5</sup> eV and 0.02 eV/Å, respectively. SnS<sub>2</sub> (001) was modeled by a 4×4 supercell, and a vacuum space of around 15 Å was set along the z direction to avoid the interaction between periodical images.

The computational hydrogen electrode (CHE) model was used to calculate the Gibbs free energy change ( $\Delta G$ ) of reaction steps:

$$\Delta G = \Delta E + \Delta ZPE - T\Delta S + \Delta G_U + \Delta G_{\text{pH}} \quad (3)$$

where  $\Delta E$  is the electronic energy difference,  $\Delta ZPE$  is the zero point energy difference,  $T$  is the room temperature (298 K) and  $\Delta S$  is the entropy change.  $\Delta G_U$  is the contribution of electrode potential, which can be calculated by:  $\Delta G_U = -eU$ , where and  $U$  is the applied potential.  $\Delta G_{\text{pH}}$  is the free energy correction of pH, which can be

calculated by:  $\Delta G_{\text{pH}} = -k_{\text{B}}T \times \text{pH} \times \ln 10$ , where  $k_{\text{B}}$  is the Boltzmann constant, and the value of pH was set to be 7 for neutral medium used in our work. The transition state of water dissociation was analyzed by a combined linear synchronous transit (LST) and quadratic synchronous transit (QST) tools.

The formation energy ( $E_{\text{f}}$ ) of SnS<sub>2</sub> containing Mo-dopant and V<sub>s</sub> (Mo-SnS<sub>2</sub>-V<sub>s</sub>) can be calculated as:

$$E_{\text{f}}(\text{Mo-SnS}_2\text{-V}_s) = E(\text{Mo-SnS}_2\text{-V}_s) - E(\text{SnS}_2) - \mu_{\text{Mo}} + \mu_{\text{Sn}} + \mu_{\text{S}} \quad (4)$$

where  $E$  is the total energies of corresponding structures,  $\mu$  is the chemical potential of corresponding atoms.

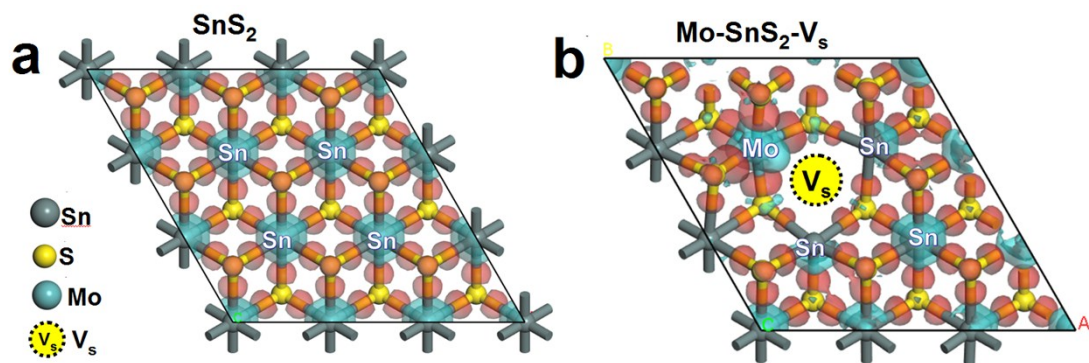

Fig. S1. Charge density distributions of (a) pristine  $\text{SnS}_2$  and (b)  $\text{Mo-SnS}_2\text{-V}_s$ . Red and cyan regions correspond to the electron accumulation and depletion, respectively.

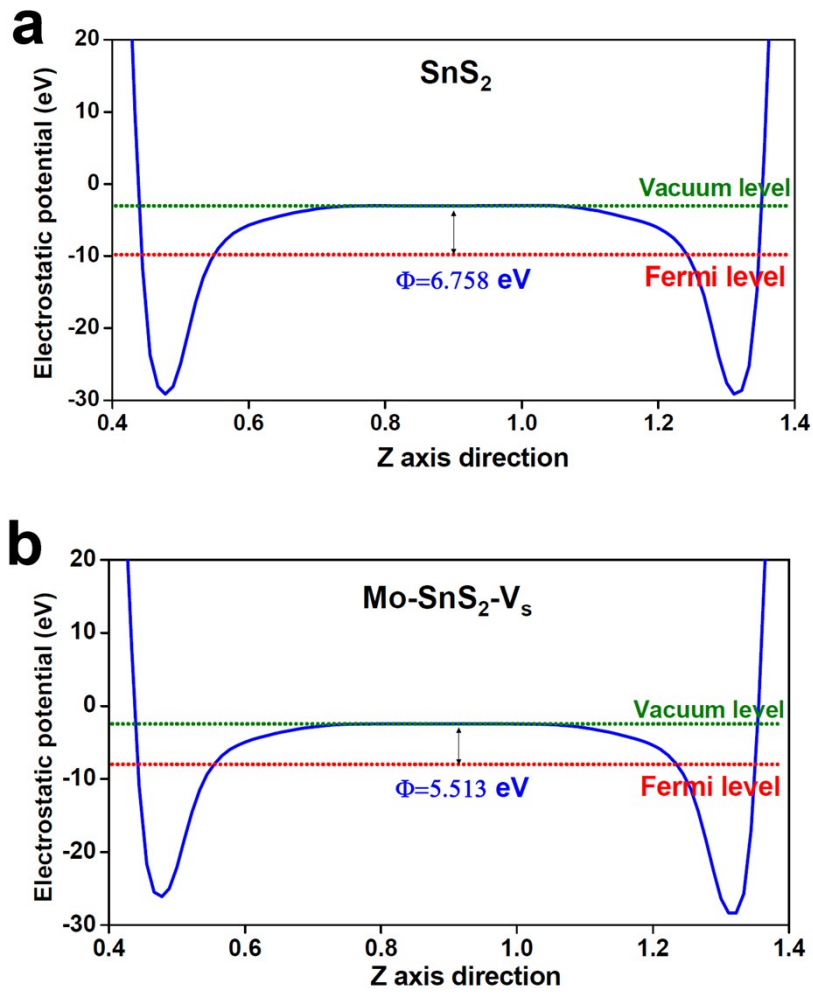

Fig. S2. Average potential profiles along c-axis direction for calculating the work functions of (a)  $\text{SnS}_2$  and (b)  $\text{Mo-SnS}_2\text{-V}_s$ .

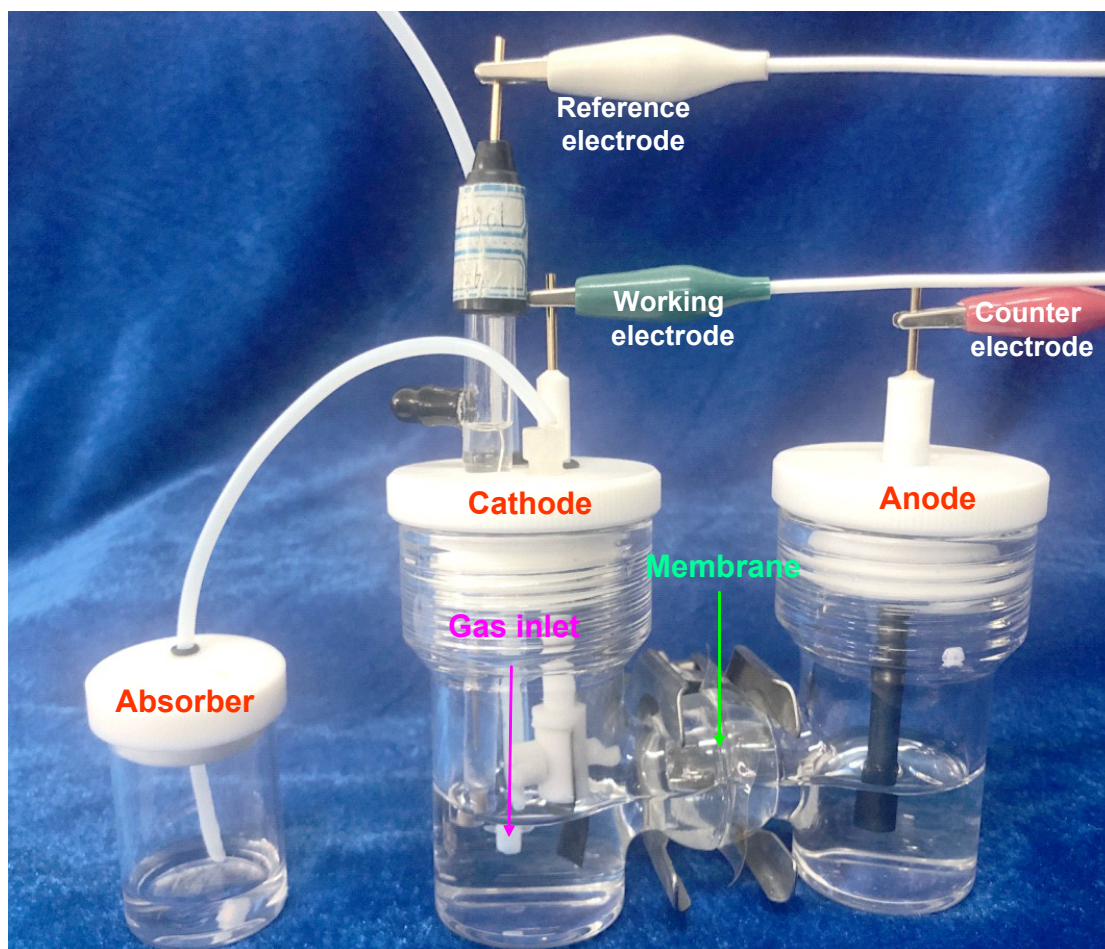

Fig. S3. Photograph of H-type electrochemical setup.



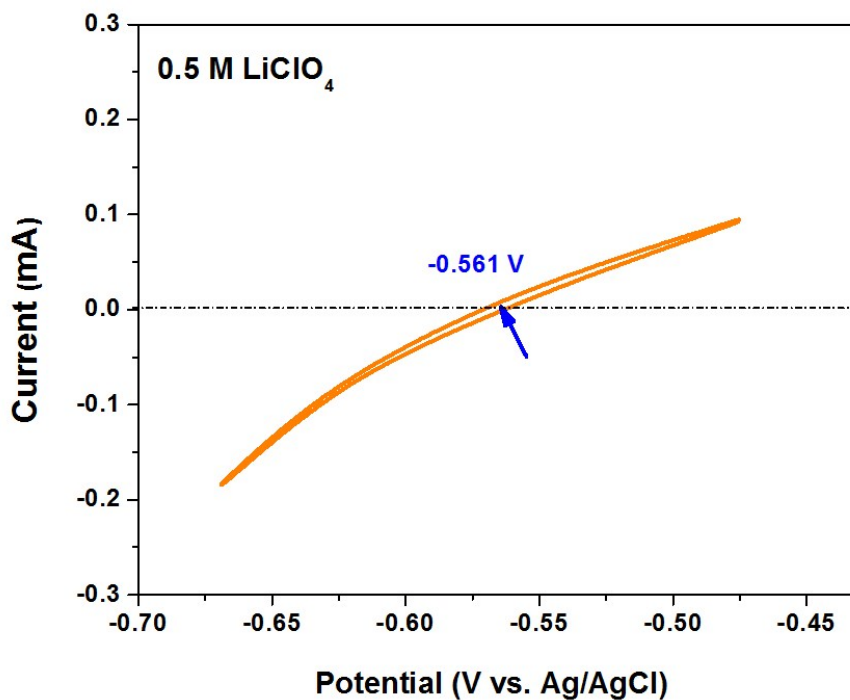

Fig. S4. The RHE calibration in 0.5 M LiClO<sub>4</sub> electrolyte.

The RHE calibration was conducted in the high-purity hydrogen saturated 0.5 M LiClO<sub>4</sub> electrolyte. The graphite rod and Pt wire were used as the counter and working electrodes, respectively. The cyclic voltammetry curves were performed at a scan rate of 1 mV s<sup>-1</sup>. The RHE calibration potential for the hydrogen oxidation/evolution reactions is the average value of the two potentials at which the current crosses zero. It is shown in Fig. S4 that the  $E(\text{RHE})$  is larger than  $E(\text{Ag/AgCl})$  by 0.561 V. Therefore, we have

$$E(\text{RHE}) = E(\text{Ag/AgCl}) + 0.561.$$

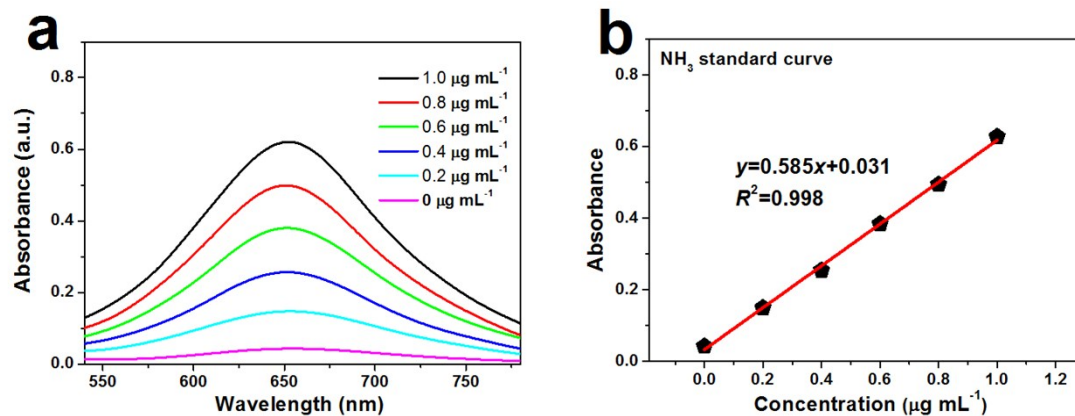

Fig. S5. (a) UV-Vis absorption spectra of indophenol assays with  $\text{NH}_4\text{Cl}$  after incubated for 2 h at ambient conditions. (b) Calibration curve used for calculation of  $\text{NH}_3$  concentrations.

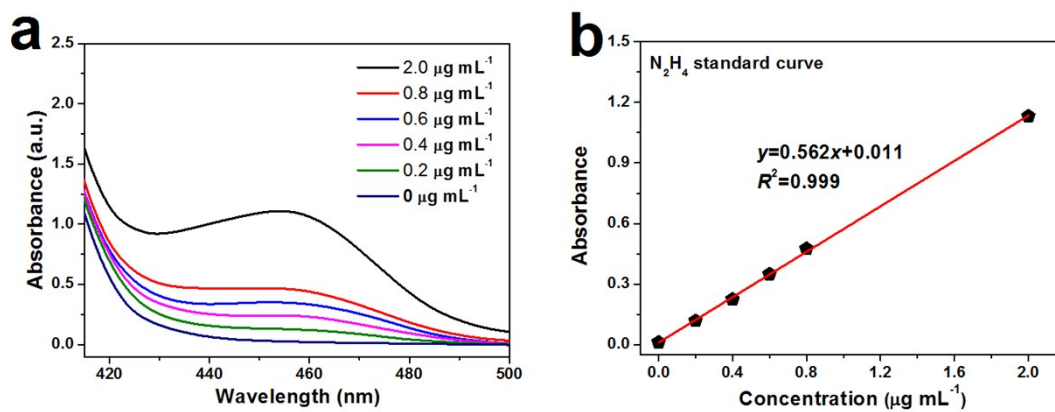

Fig. S6. (a) UV-Vis absorption spectra of  $N_2H_4$  assays after incubated for 20 min at ambient conditions. (b) Calibration curve used for calculation of  $N_2H_4$  concentrations.

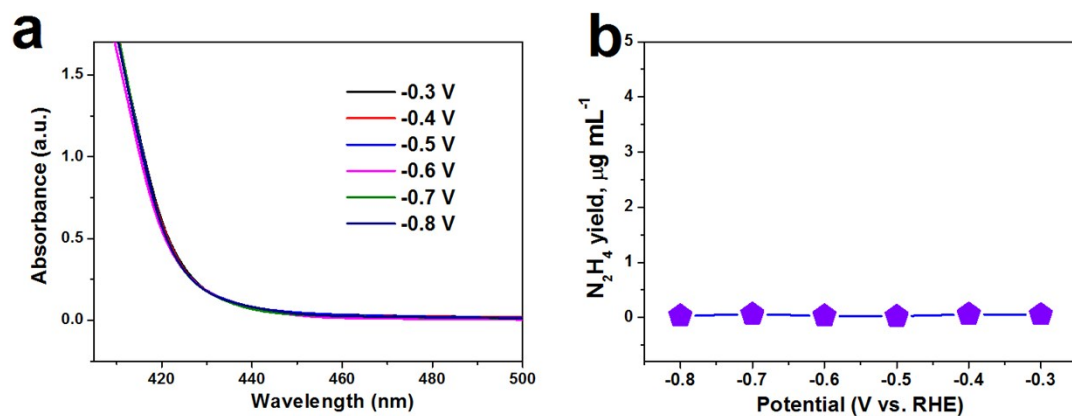

Fig. S7. (a) UV-Vis spectra of the electrolytes (stained with the chemical indicator based on the method of Watt and Chrisp) after 2 h electrocatalysis on Mo-SnS<sub>2</sub>/CC at various potentials, and (b) corresponding N<sub>2</sub>H<sub>4</sub> concentrations in the electrolytes.

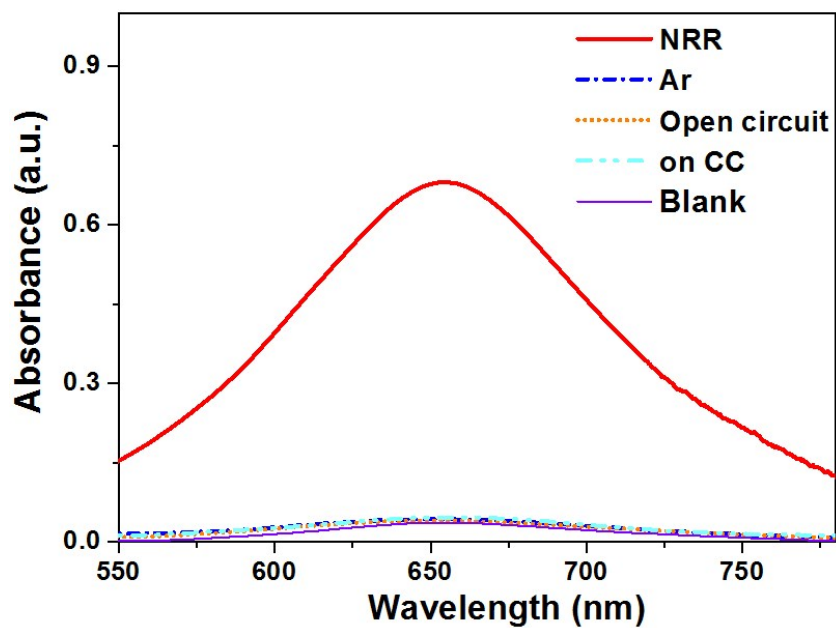

Fig. S8. UV-Vis absorption spectra of working electrolytes after 2 h of electrolysis on Mo-SnS<sub>2</sub>/CC at -0.5 V in N<sub>2</sub>-saturated solution, Ar-saturated solutions, N<sub>2</sub>-saturated solution at open circuit, N<sub>2</sub>-saturated solution on pristine CC and blank data.

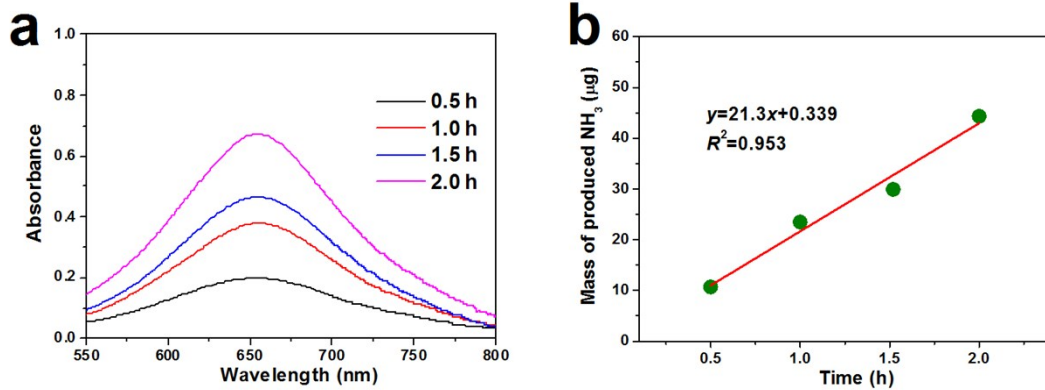

Fig. S9. (a) UV-Vis absorption spectra of the electrolytes after electrolysis at various times on Mo-SnS<sub>2</sub>/CC at -0.5 V, and (b) corresponding mass of produced NH<sub>3</sub>.

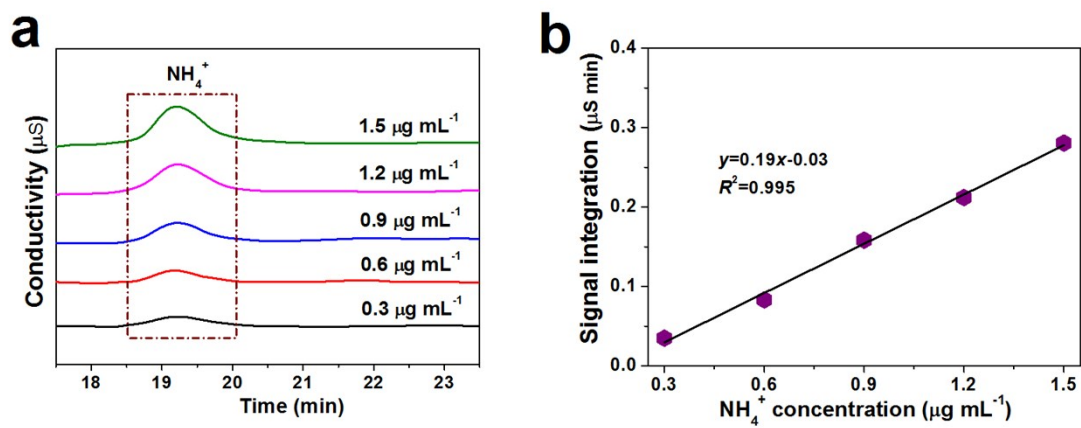

Fig. S10. (a) Ion chromatogram (IC) analysis of the  $\text{NH}_4^+$  ions at different concentrations (inset), and (b) corresponding calibration curve of  $\text{NH}_4^+$  concentration  $V_s$ . peak area.

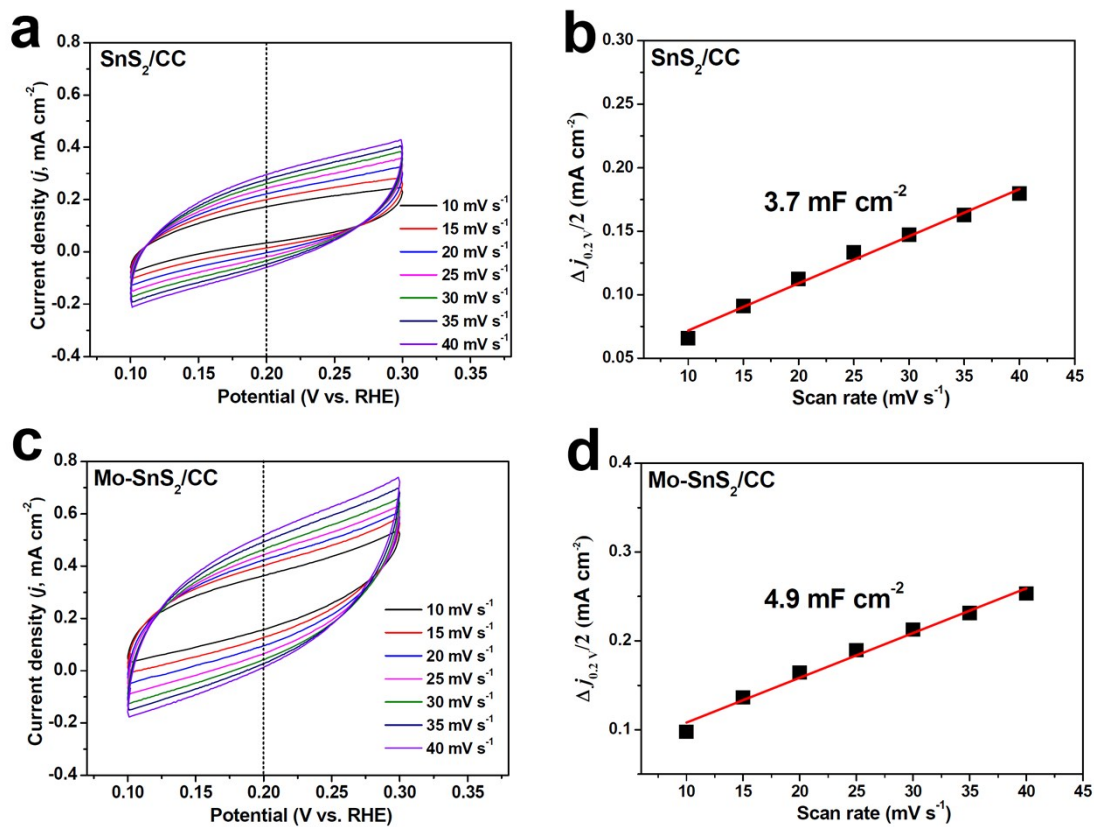

Fig. S11. Electrochemical double-layer capacitance ( $C_{dl}$ ) measurements at different scanning rates of 10~40 mV s<sup>-1</sup> for (a, b) SnS<sub>2</sub>/CC and (c, d) Mo-SnS<sub>2</sub>/CC.



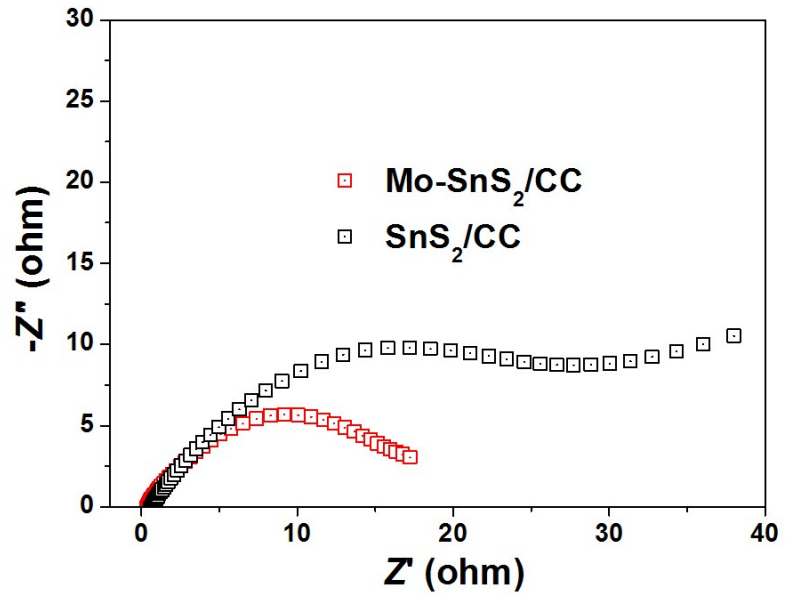

Fig. S12. Electrochemical impedance spectra of SnS<sub>2</sub>/CC and Mo-SnS<sub>2</sub>/CC.

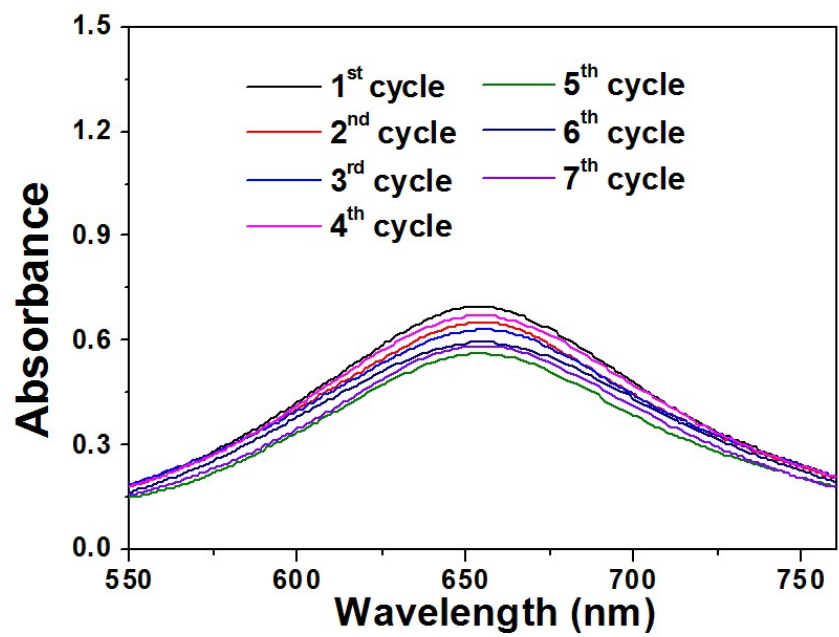

Fig. S13. UV-Vis absorption spectra of working electrolytes on Mo-SnS<sub>2</sub>/CC (each for 2 h electrolysis at -0.5 V) for seven cycles.

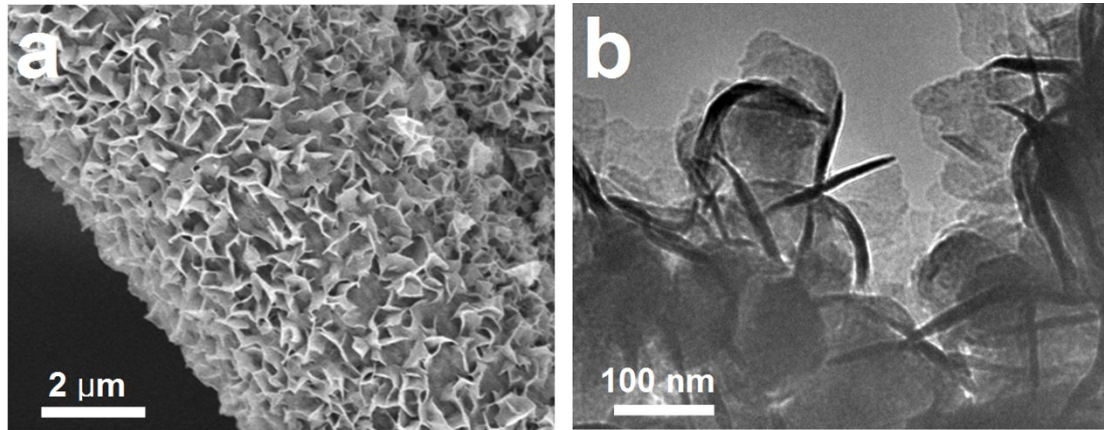

Fig. S14. Morphology of Mo-SnS<sub>2</sub>/CC after stability test. (a) SEM. (b) TEM.

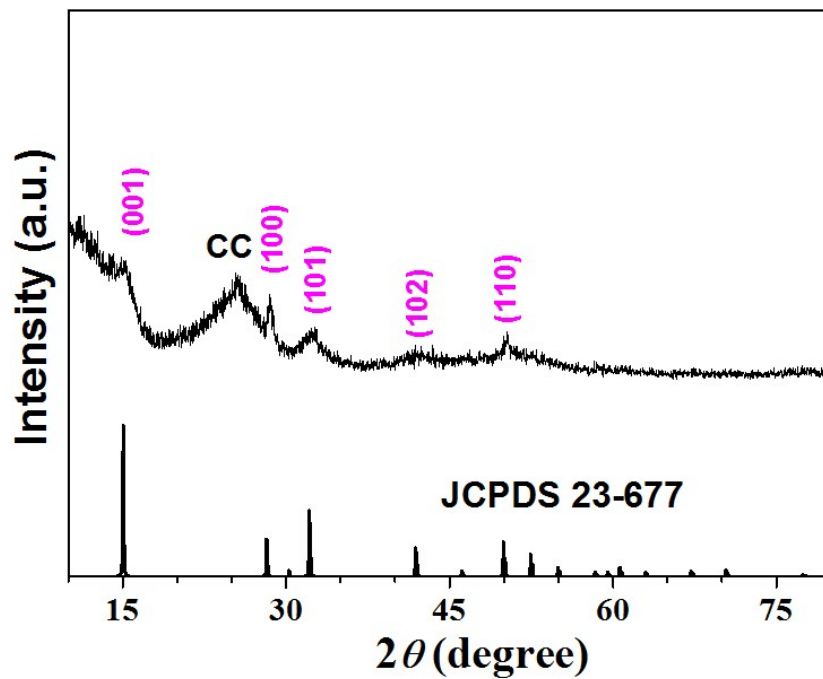

Fig. S15. XRD pattern of Mo-SnS<sub>2</sub>/CC after stability test.

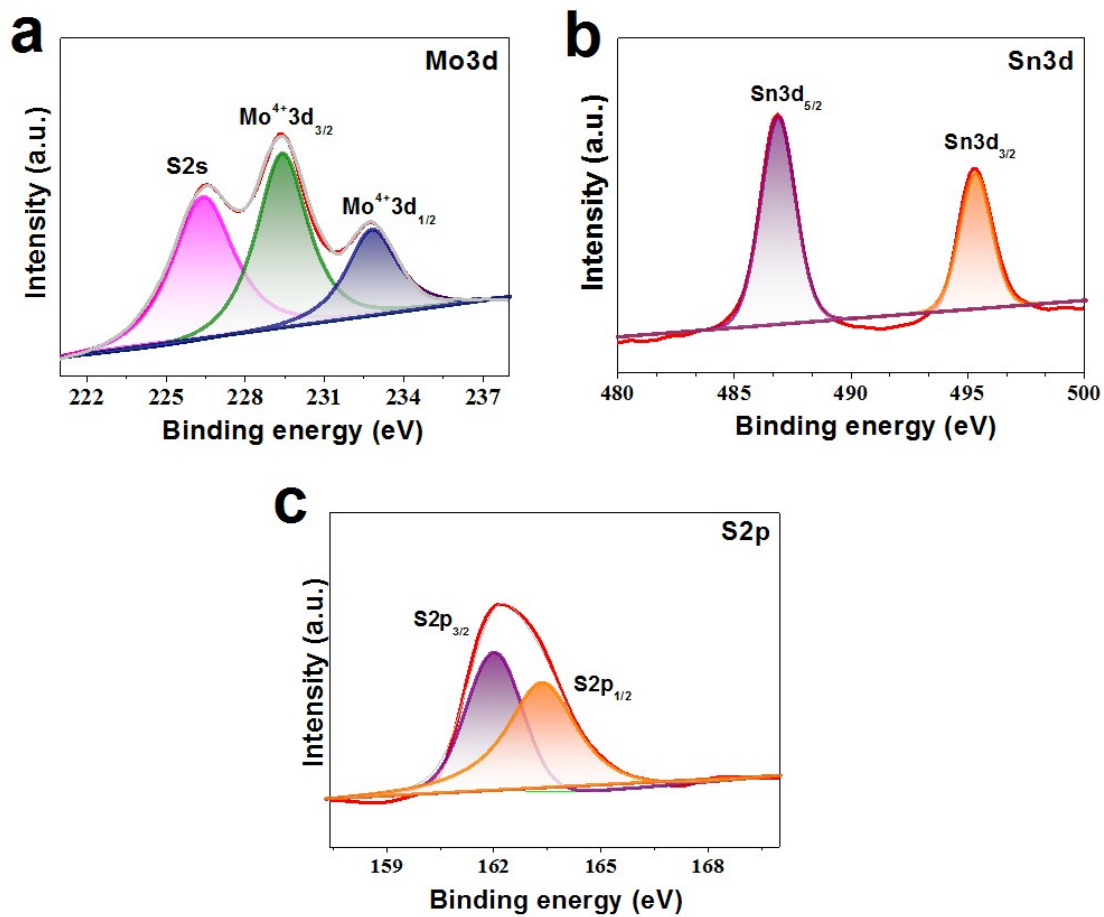

Fig. S16. XPS spectra of Mo-SnS<sub>2</sub> nanosheets scraped down from CC after stability test: (a) Mo3d; (b) Sn3d; (c) S2p.

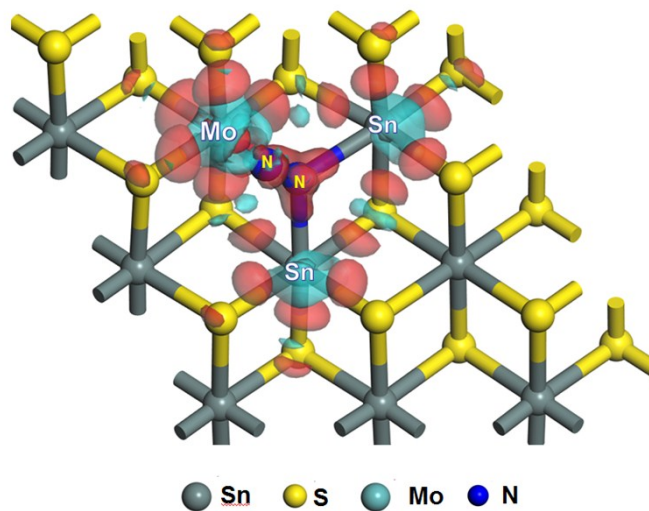

Fig. S17. Differential charge densities of Mo-Sn-Sn trimer after  $N_2$  adsorption. Red and cyan regions correspond to the electron accumulation and depletion, respectively.

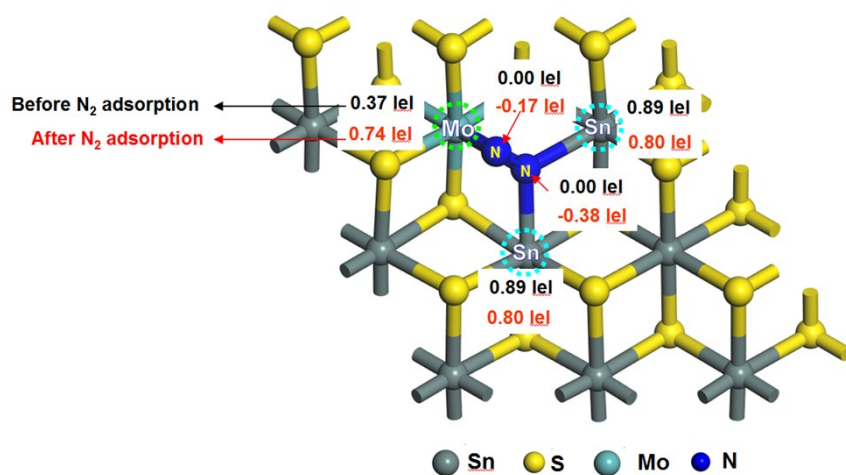

Fig. S18. Mulliken charge analysis of Mo-Sn-Sn trimer before (black) and after (red) N<sub>2</sub> adsorption.

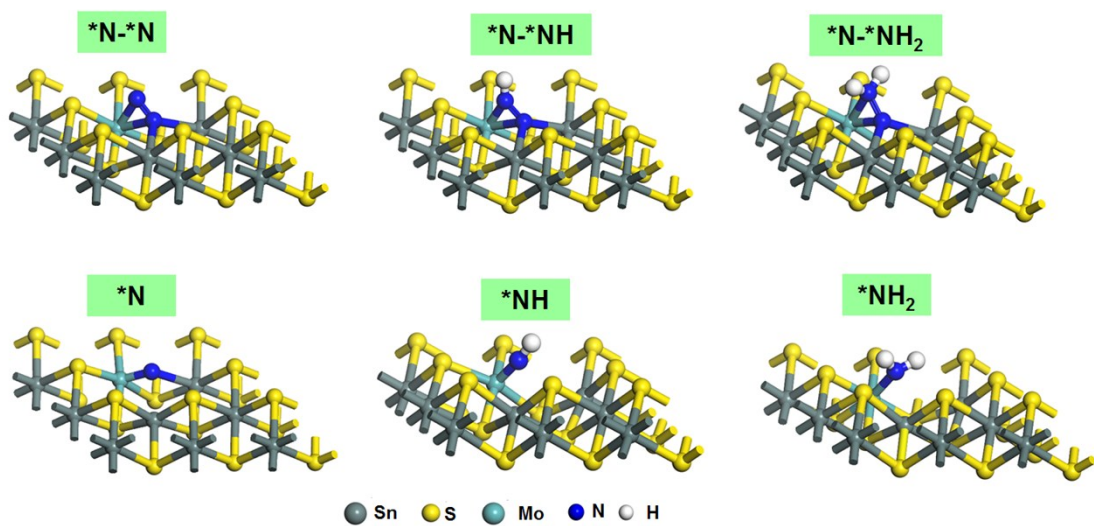

Fig. S19. Optimized structures of consecutive NRR intermediates over Mo-SnS<sub>2</sub>-V<sub>s</sub>.



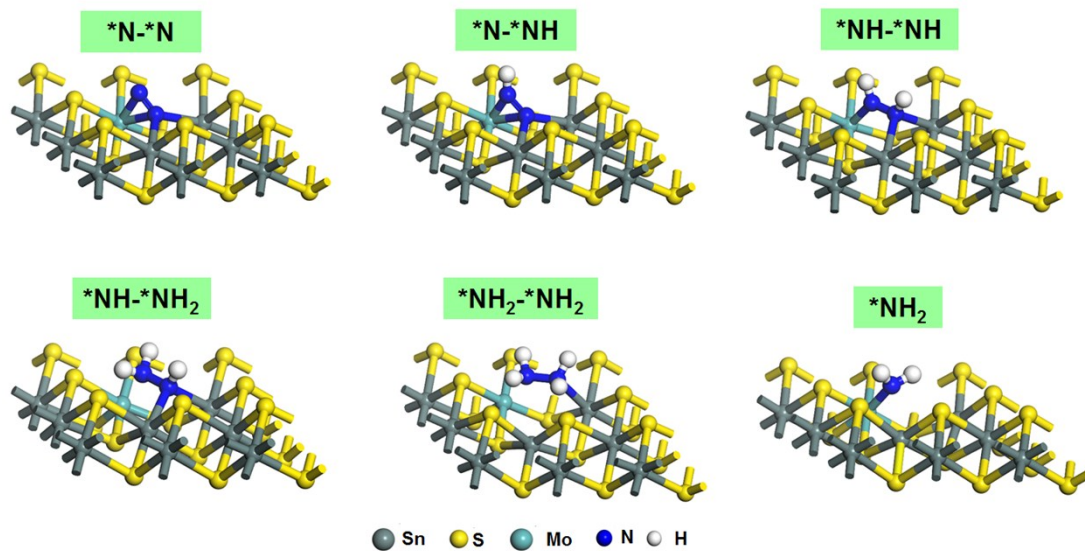

Fig. S20. Optimized structures of enzymatic NRR intermediates over Mo-SnS<sub>2</sub>-V<sub>s</sub>.

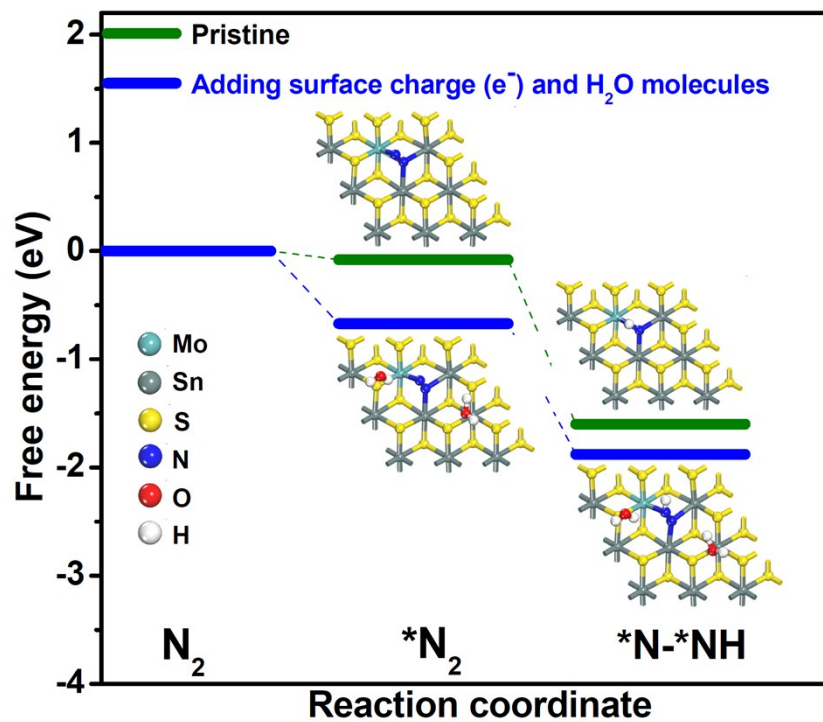

Fig. S21. Free energy diagrams of  $*N_2$  and  $*N-*NH$  adsorption on  $Mo-SnS_2-V_s$  with (pristine) and without considering the effects of surface charge (adding one charge  $e^-$ ) and hydrogen bonding (adding two  $H_2O$  molecules).

Table S1. Comparison of optimum NH<sub>3</sub> yield and Faradic efficiency (FE) for recently reported state-of-the-art NRR electrocatalysts at ambient conditions

| Catalyst                                     | Electrolyte                           | Determination method     | Optimum Potential (V V <sub>s</sub> RHE) | NH <sub>3</sub> yield rate                                | FE (%)       | Ref . |
|----------------------------------------------|---------------------------------------|--------------------------|------------------------------------------|-----------------------------------------------------------|--------------|-------|
| Black phosphorus                             | 0.01 M HCl                            | Indophenol blue method   | -0.7                                     | 31.37 $\mu\text{g h}^{-1} \text{mg}^{-1}$                 | 5.07 (-0.6)  | [4]   |
| MoO <sub>2</sub> /graphene                   | 0.1 M Na <sub>2</sub> SO <sub>4</sub> | Indophenol blue method   | -0.35                                    | 37.4 $\mu\text{g h}^{-1} \text{mg}^{-1}$                  | 6.6          | [5]   |
| Fe <sub>2</sub> O <sub>3</sub> nanorod       | 0.1 M Na <sub>2</sub> SO <sub>4</sub> | Indophenol blue method   | -0.8                                     | 15.9 $\mu\text{g h}^{-1} \text{mg}^{-1}$                  | 0.94         | [6]   |
| Fe/Fe <sub>3</sub> O <sub>4</sub>            | 0.1 M PBS                             | Indophenol blue method   | -0.3                                     | 0.19 $\mu\text{g cm}^{-2} \text{h}^{-1}$                  | 8.29         | [7]   |
| S-doped carbon nanospheres                   | 0.1 M Na <sub>2</sub> SO <sub>4</sub> | Indophenol blue method   | -0.7                                     | 19.07 $\mu\text{g h}^{-1} \text{mg}^{-1}$                 | 7.47         | [8]   |
| N-doped porous carbon                        | 0.05 M H <sub>2</sub> SO <sub>4</sub> | Nessler's reagent method | -0.9                                     | 1.4 $\text{mmol g}^{-1} \text{h}^{-1}$                    | 1.42         | [9]   |
| N-doped porous carbon                        | 1.0 M HCl                             | Indophenol blue method   | -0.3                                     | 9 $\mu\text{g cm}^{-2} \text{h}^{-1}$                     | 5.2          | [10]  |
| Defective rich C <sub>3</sub> N <sub>4</sub> | 0.1 M HCl                             | Indophenol blue method   | -0.2                                     | 8.09 $\mu\text{g h}^{-1} \text{mg}^{-1}$                  | 11.59        | [11]  |
| B-doped graphene                             | 0.05 M H <sub>2</sub> SO <sub>4</sub> | Indophenol blue method   | -0.5                                     | 9.8 $\mu\text{g cm}^{-2} \text{h}^{-1}$                   | 10.8         | [12]  |
| Sulfur dots-graphene nanohybrid              | 0.5 M LiClO <sub>4</sub>              | Indophenol blue method   | -0.85                                    | 28.56 $\mu\text{g h}^{-1} \text{mg}^{-1}$                 | 7.07         | [13]  |
| Sulfur-doped graphene                        | 0.1 M HCl                             | Indophenol blue method   | -0.6                                     | 27.3 $\mu\text{g h}^{-1} \text{mg}^{-1}$                  | 11.5 (-0.5V) | [14]  |
| Cr <sub>2</sub> O <sub>3</sub> /RGO          | 0.1 M HCl                             | Indophenol blue method   | -0.6                                     | 33.3 $\mu\text{g h}^{-1} \text{mg}^{-1}$                  | 7.33         | [15]  |
| Boron-doped TiO <sub>2</sub>                 | 0.1 M Na <sub>2</sub> SO <sub>4</sub> | Indophenol blue method   | -0.8                                     | 14.4 $\mu\text{g h}^{-1} \text{mg}^{-1}$                  | 3.4          | [16]  |
| La <sub>2</sub> O <sub>3</sub> nanoplate     | 0.1 M Na <sub>2</sub> SO <sub>4</sub> | Indophenol blue method   | -0.8                                     | 17.04 $\mu\text{g h}^{-1} \text{mg}^{-1}$                 | 4.76         | [17]  |
| Y <sub>2</sub> O <sub>3</sub> Nanosheet      | 0.1 M Na <sub>2</sub> SO <sub>4</sub> | Indophenol blue method   | -0.9                                     | $1.06 \times 10^{-10} \text{ mol s}^{-1} \text{ cm}^{-2}$ | 2.53         | [18]  |
| Defective TiO <sub>2</sub>                   | 0.1 M HCl                             | Indophenol blue method   | -0.15                                    | $1.24 \times 10^{-10} \text{ mol s}^{-1} \text{ cm}^{-2}$ | 9.17         | [19]  |
| B <sub>4</sub> C nanosheet                   | 0.1 M HCl                             | Indophenol blue method   | -0.75                                    | 26.57 $\mu\text{g h}^{-1} \text{mg}^{-1}$                 | 15.95        | [20]  |
| MoS <sub>2</sub> nanosheet                   | 0.1 M                                 | Indophenol blue          | -0.5                                     | $8.08 \times 10^{-11}$                                    | 1.17         | [21]  |

|                                                      | Na <sub>2</sub> SO <sub>4</sub>       | method                   |       | mol s <sup>-1</sup> cm <sup>-2</sup>                             |                 |           |
|------------------------------------------------------|---------------------------------------|--------------------------|-------|------------------------------------------------------------------|-----------------|-----------|
| Defect-rich MoS <sub>2</sub> nanoflower              | 0.1 M Na <sub>2</sub> SO <sub>4</sub> | Indophenol blue method   | -0.4  | 29.28<br>μg h <sup>-1</sup> mg <sup>-1</sup>                     | 8.34            | [22]      |
| Au-TiO <sub>2</sub> sub-nanocluster                  | 0.1 M HCl                             | Indophenol blue method   | -0.2  | 21.4<br>μg h <sup>-1</sup> mg <sup>-1</sup>                      | 8.11            | [23]      |
| Au nanorods                                          | 0.1 M KOH                             | Nessler's reagent method | -0.2  | 1.65<br>μg cm <sup>-2</sup> h <sup>-1</sup>                      | 4.02            | [24]      |
| Mo <sub>2</sub> C/C                                  | 0.5 M Li <sub>2</sub> SO <sub>4</sub> | Nessler's reagent method | -0.3  | 11.3<br>μg h <sup>-1</sup> mg <sup>-1</sup>                      | 7.8             | [25]      |
| MXene                                                | 0.5 M Li <sub>2</sub> SO <sub>4</sub> | Nessler's reagent method | -0.1  | 4.7<br>μg cm <sup>-2</sup> h <sup>-1</sup>                       | 5.78            | [26]      |
| Mosaic Bi nanosheets                                 | 0.1 M Na <sub>2</sub> SO <sub>4</sub> | Indophenol blue method   | -0.8  | 13.23<br>μg h <sup>-1</sup> mg <sup>-1</sup>                     | 10.46           | [27]      |
| Fe-N/C hybrid                                        | 0.1 M KOH                             | Indophenol blue method   | -0.2  | 34.83<br>μg h <sup>-1</sup> mg <sup>-1</sup>                     | 9.28            | [28]      |
| α-Fe nanorods                                        | [C4mpyr]<br>[eFAP]                    | Indophenol blue method   | -0.23 | 2.35 × 10 <sup>-11</sup><br>mol s <sup>-1</sup> cm <sup>-2</sup> | 32              | [29]      |
| Amorphous Sn/crystalline SnS <sub>2</sub> nanosheets | 0.1 M PBS                             | Indophenol blue method   | -0.8  | 23.8<br>μg h <sup>-1</sup> mg <sup>-1</sup>                      | 6.5<br>(-0.7V)  | [30]      |
| SnS <sub>2</sub> nanoarray on Ni foam                | 0.1 M Na <sub>2</sub> SO <sub>4</sub> | Indophenol blue method   | -0.5  | 9.3 × 10 <sup>-10</sup><br>mol s <sup>-1</sup> cm <sup>-2</sup>  | 11.2            | [31]      |
| Mo-SnS <sub>2</sub> /CC                              | 0.5 M LiClO <sub>4</sub>              | Indophenol blue method   | -0.5  | 41.3<br>μg h <sup>-1</sup> mg <sup>-1</sup>                      | 20.8<br>(-0.4V) | This work |

Table S2. Calculated ZPE and TΔS energies of various NRR intermediates over Mo-SnS<sub>2</sub>

|                                    | $\Delta ZPE$ (eV) | TΔS (eV) |
|------------------------------------|-------------------|----------|
| *N-*N                              | 0.22              | 0.09     |
| *N-*NH                             | 0.46              | 0.13     |
| *NH-*NH                            | 0.85              | 0.12     |
| *NH-*NH <sub>2</sub>               | 1.18              | 1.08     |
| *NH <sub>2</sub> -*NH <sub>2</sub> | 1.45              | 0.15     |
| *NH <sub>2</sub>                   | 0.76              | 0.05     |
| *N-*NH <sub>2</sub>                | 0.83              | 0.15     |
| *N                                 | 0.09              | 0.05     |
| *NH                                | 0.4               | 0.05     |
| N <sub>2</sub>                     | 0.15              | 0.6      |
| H <sub>2</sub>                     | 0.27              | 0.4      |
| NH <sub>3</sub>                    | 0.89              | 0.74     |

## Supplementary references

- [1]. D. Zhu, L. Zhang, R. E. Ruther and R. J. Hamers, *Nat. Mater.*, 2013, **12**, 836.
- [2]. G. W. Watt and J. D. Crisp, *Anal. Chem.*, 1952, **24**, 2006-2008.
- [3]. S. J. Clark, M. D. Segall, C. J. Pickard, P. J. Hasnip, M. I. J. Probert, K. Refson and M. C. Payne, *Z. Kristallogr.*, 2005, **220**, 567-570.
- [4]. L. L. Zhang, L. X. Ding, G. F. Chen, X. F. Yang and H. H. Wang, *Angew. Chem. Int. Edit.*, 2019, **131**, 2638-2642.
- [5]. J. Wang, Y. P. Liu, H. Zhang, D. J. Huang and K. Chu, *Catal. Sci. Technol.*, 2019, **9**, 4248-4254.
- [6]. X. Xiang, Z. Wang, X. Shi, M. Fan and X. Sun, *ChemCatChem*, 2018, **10**, 4530-4535.
- [7]. L. Hu, A. Khaniya, J. Wang, G. Chen, W. E. Kaden and X. Feng, *ACS Catal.*, 2018, **8**, 9312-9319.
- [8]. L. Xia, X. Wu, Y. Wang, Z. Niu, Q. Liu, T. Li, X. Shi, A. M. Asiri and X. Sun, *Small Methods*, 2018, **3**, 1800251.
- [9]. Y. Liu, Y. Su, X. Quan, X. Fan, S. Chen, H. Yu, H. Zhao, Y. Zhang and J. Zhao, *ACS Catal.*, 2018, **8**, 1186-1191.
- [10]. H. Wang, L. Wang, Q. Wang, S. Ye, W. Sun, Y. Shao, Z. Jiang, Q. Qiao, Y. Zhu and P. Song, *Angew. Chem. Int. Edit.*, 2018, **57**, 12360-12364.
- [11]. C. Lv, Y. Qian, C. Yan, Y. Ding, Y. Liu, G. Chen and G. Yu, *Angew. Chem. Int. Edit.*, 2018, **57**, 10246-10250.
- [12]. X. Yu, P. Han, Z. Wei, L. Huang, Z. Gu, S. Peng, J. Ma and G. Zheng, *Joule*, 2018, **2**, 1610-1622.
- [13]. H. Chen, X. Zhu, H. Huang, H. Wang, T. Wang, R. Zhao, H. Zheng, A. M. Asiri, Y. Luo and X. Sun, *Chem. Commun.*, 2019, **55**, 3152-3155.
- [14]. L. Xia, J. Yang, H. Wang, R. Zhao, H. Chen, W. Fang, A. M. Asiri, F. Xie, G. Cui and X. Sun, *Chem. Commun.*, 2019, **55**, 3371-3374.
- [15]. L. Xia, B. Li, Y. Zhang, R. Zhang, L. Ji, H. Chen, G. Cui, H. Zheng, X. Sun, F. Xie and Q. Liu, *Inorg. Chem.*, 2019, **58**, 2257-2260.
- [16]. Y. Wang, K. Jia, Q. Pan, Y. Xu, Q. Liu, G. Cui, X.-D. Guo and X. Sun, *ACS Sustain. Chem. Eng.*, 2018.
- [17]. B. Xu, Z. Liu, W. Qiu, Q. Liu, X. Sun, G. Cui, Y. Wu and X. Xiong, *Electrochim. Acta*, 2018, **298**, 106-111.
- [18]. X. Li, L. Li, X. Ren, D. Wu, Y. Zhang, H. Ma, X. Sun, B. Du, Q. Wei and B. Li, *Ind. Eng. Chem. Res.*, 2018, **57**, 16622-16627.
- [19]. L. Yang, T. Wu, R. Zhang, H. Zhou, L. Xia, X. Shi, H. Zheng, Y. Zhang and X. Sun, *Nanoscale*, 2019, **11**, 1555-1562.
- [20]. W. Qiu, X.-Y. Xie, J. Qiu, W.-H. Fang, R. Liang, X. Ren, X. Ji, G. Cui, A. M. Asiri and G. Cui, *Nat. Commun.*, 2018, **9**, 3485.
- [21]. L. Zhang, X. Ji, X. Ren, Y. Ma, X. Shi, Z. Tian, A. M. Asiri, L. Chen, B. Tang and X. Sun, *Adv. Mater.*, 2018, **30**, 1800191.
- [22]. X. Li, T. Li, Y. Ma, Q. Wei, W. Qiu, H. Guo, X. Shi, P. Zhang, A. M. Asiri and L. Chen, *Adv. Energy. Mater.*, 2018, **8**, 1801357.
- [23]. M. M. Shi, D. Bao, B. R. Wulan, Y. H. Li, Y. F. Zhang, J. M. Yan and Q. Jiang, *Adv. Mater.*, 2017, **29**, 1606550.

- [24]. D. Bao, Q. Zhang, F. L. Meng, H. X. Zhong, M. M. Shi, Y. Zhang, J. M. Yan, Q. Jiang and X. B. Zhang, *Adv. Mater.*, 2017, **29**, 1604799.
- [25]. H. Cheng, L. X. Ding, G. F. Chen, L. Zhang, J. Xue and H. Wang, *Adv. Mater.*, 2018, **30**, 1803694.
- [26]. Y. R. Luo, G. F. Chen, L. Ding, X. Z. Chen, L. X. Ding and H. H. Wang, *Joule*, 2019, **3**, 279-289.
- [27]. L. Li, C. Tang, B. Xia, H. Jin, Y. Zheng and S.-Z. Qiao, *ACS Catal.*, 2019, **9**, 2902-2908.
- [28]. Y. Wang, X. Cui, J. Zhao, G. Jia, L. Gu, Q. Zhang, L. Meng, Z. Shi, L. Zheng and C. Wang, *ACS Catal.*, 2018, **9**, 336-344.
- [29]. B. H. Suryanto, C. S. Kang, D. Wang, C. Xiao, F. Zhou, L. M. Azofra, L. Cavallo, X. Zhang and D. R. MacFarlane, *ACS Energy Lett.*, 2018, **3**, 1219-1224.
- [30]. P. Li, W. Fu, P. Zhuang, Y. Cao, C. Tang, A. B. Watson, P. Dong, J. Shen and M. Ye, *Small*, 2019, **15**, 1902535.
- [31]. X. Chen, Y.-T. Liu, C. Ma, J. Yu and B. Ding, *J. Mater. Chem. A*, 2019, **7**, 22235-22241.
